# Supplementary material for: Auditory Cortex Maturation and Language Development in Children with Hearing Loss and Additional Disabilities
Source: MDPI journal article supplement (doi:10.3390/children10111813), 2023-11-15
Supplement: s1 [file s1]

| <i>Disabilitiy</i>               | <i>n</i> |
|----------------------------------|----------|
| Charge                           | 1        |
| Cleft Palate                     | 1        |
| CMV                              | 2        |
| CMV and Fine Motor               | 1        |
| CMV and Gross Motor              | 2        |
| CMV, Fine and Gross Motor        | 2        |
| Epilepsy                         | 1        |
| Epilepsy, Fine and Gross Motor   | 1        |
| Fine and Gross Motor             | 1        |
| Fine Motor                       | 3        |
| Fine Motor and Epilepsy          | 1        |
| Gross Motor                      | 2        |
| Gross Motor and Hypotonia        | 1        |
| Heart Defect                     | 3        |
| Heart Defect and Asthma          | 1        |
| Hypotonia, Asthma, and Dysphagia | 1        |
| Meningitis                       | 1        |
| Metabolic Disorder               | 1        |
| Missing Kidney                   | 1        |
| Pendred                          | 2        |
| Traumatic Brain Injury           | 1        |
| Usher Type II                    | 1        |
| Waardenburg                      | 4        |
| Waardenburg and Gross Motor      | 1        |
